# Supplementary material for: Biotyping of Multidrug-Resistant Klebsiella pneumoniae Clinical Isolates from France and Algeria Using MALDI-TOF MS
Source: PLoS One. 2013 Apr 19;8(4):e61428. doi: 10.1371/journal.pone.0061428 (PMC3631213; doi:10.1371/journal.pone.0061428)
Supplement: Table S1 — Distribution of Klebsiella pneumoniae strains according to the dendrogram generated by BIOTYPER software (version 2, Bruker Daltonics) at the distance level of 500. (DOCX) [file pone.0061428.s001.docx]

**Table S1.** Distribution of *Klebsiella pneumoniae* strains according to the dendrogram generated by BIOTYPER software(version 2, Bruker Daltonics) at the distance level of 500.

| **Clusters (Number)** | | **Cities (Number)** | | **Type of samples (Number)** | | **Phenotype (Number)** | |
| --- | --- | --- | --- | --- | --- | --- | --- |
| **C1** | **16** | Marseille | 16 | Urine | 9 | WT | 8 |
| ESBL | 1 |
| Blood culture | 2 | ESBL | 1 |
| WT | 1 |
| Bedsore | 1 | WT | 1 |
| Profound swab | 2 | WT | 2 |
| Pus | 2 | WT | 2 |
| **C2** | **7** | Annaba | 1 | Tracheal aspirate | 1 | ESBL | 1 |
| Marseille | 6 | Blood culture | 1 | ESBL | 1 |
| Urine | 5 | WT | 5 |
| **C3** | **65** | Annaba | 1 | Tracheal aspirate | 1 | ESBL | 1 |
| Angers | 2 | Tracheal aspirate | 1 | WT | 1 |
| Vaginal swab | 1 | WT | 1 |
| Marseille | 10 | Urine | 8 | WT | 7 |
| ESBL | 1 |
| Blood culture | 1 | ESBL | 1 |
| Not determined | 1 | ESBL | 1 |
| Oran | 5 | Rectal swab | 1 | Pase HL | 1 |
| Tracheal aspirate | 1 | ESBL | 1 |
| Pus | 1 | ESBL | 1 |
| Urine | 1 | WT | 1 |
| Environment | 1 | ESBL | 1 |
| Nice | 47 | Blood culture | 22 | ESBL | 2 |
| Pase HL | 3 |
| WT | 17 |
| Pus | 25 | ESBL | 3 |
| Pase HL | 3 |
| WT | 18 |
| Pase IRT | 1 |
| **C4** | **215** | Annaba | 1 | Tracheal aspirate | 1 | ESBL | 1 |
| Angers | 54 | Catheter | 2 | ESBL + Case | 1 |
| WT | 1 |
| Tracheal aspirate | 2 | WT | 2 |
| Urine | 33 | WT | 19 |
| Pase IRT | 1 |
| Case | 2 |
| ESBL | 9 |
| ESBL + Case | 2 |
| Blood culture | 12 | ESBL | 3 |
| WT | 9 |
| Rectal swab | 4 | WT | 2 |
| ESBL + Case | 2 |
| Pus | 1 | WT | 1 |
| Nice | 6 | Blood culture | 3 | WT | 1 |
| Pase HL | 1 |
| ESBL | 1 |
| Pus | 3 | ESBL | 1 |
| WT | 2 |
| Oran | 14 | Pus | 2 | WT | 1 |
| ESBL | 1 |
| Rectal swab | 2 | ESBL | 2 |
| Tracheal aspirate | 8 | WT | 3 |
| ESBL | 1 |
| ESBL + Case | 4 |
| Environment | 2 | ESBL | 1 |
| ESBL + Case | 1 |
| Sidi  Bel Abbes | 10 | Tracheal aspirate | 2 | ESBL | 1 |
| ESBL + Case | 1 |
| Urine | 3 | ESBL | 2 |
| Pase IRT | 1 |
| Environment | 1 | ESBL | 1 |
| Pus | 4 | ESBL | 3 |
| ESBL + Case | 1 |
| Tlemcen | 13 | Tracheal aspirate | 5 | ESBL | 5 |
| Urine | 1 | Pase HL | 1 |
| Environment | 1 | ESBL | 1 |
| Pus | 1 | ESBL | 1 |
| Rectal swab | 5 | ESBL | 3 |
| ESBL + Case | 2 |
| Marseille | 117 | Tracheal aspirate | 8 | ESBL | 3 |
| WT | 5 |
| Urine | 74 | WT | 56 |
| Pase IRT | 2 |
| ESBL | 16 |
| Blood culture | 14 | ESBL | 3 |
| WT | 11 |
| Profound swab | 4 | WT | 3 |
| ESBL | 1 |
| Pus | 3 | ESBL | 1 |
| WT | 2 |
| Not determined | 13 | WT | 2 |
| ESBL | 11 |
| Catheter | 1 | ESBL | 1 |
| **C5** | **232** | Oran | 74 | Tracheal aspirate | 43 | ESBL | 31 |
| ESBL + Case | 7 |
| WT | 5 |
| Urine | 12 | WT | 3 |
| ESBL + Case | 1 |
| ESBL | 8 |
| Pus | 10 | ESBL + Case | 1 |
| ESBL | 9 |
| Rectal swab | 6 | ESBL | 3 |
| ESBL + Case | 2 |
| Pase HL | 1 |
| Vaginal swab | 1 | ESBL | 1 |
| Environment | 2 | ESBL | 2 |
| Angers | 44 | Catheter | 1 | ESBL | 1 |
| Urine | 25 | ESBL | 4 |
| ESBL + Case | 1 |
| Pase IRT | 1 |
| WT | 19 |
| Blood culture | 6 | WT | 5 |
| ESBL | 1 |
| Rectal swab | 5 | ESBL | 5 |
| Vaginal swab | 5 | ESBL | 1 |
| WT | 4 |
| Pus | 2 | WT | 2 |
| Tlemcen | 59 | Tracheal aspirate | 23 | WT | 3 |
| ESBL | 19 |
| ESBL + Case | 1 |
| Profound swab | 1 | ESBL | 1 |
| Rectal swab | 13 | ESBL | 12 |
| ESBL + Case | 1 |
| Pus | 10 | ESBL + Case | 2 |
| ESBL | 8 |
| Environment | 10 | ESBL | 6 |
| Case | 1 |
| ESBL + Case | 3 |
| Urine | 2 | ESBL | 2 |
| Marseille | 21 | Pus | 1 | ESBL | 1 |
| Subcutaneous swab | 1 | WT | 1 |
| Not determined | 3 | ESBL | 3 |
| Blood culture | 3 | WT | 3 |
| Urine | 12 | WT | 7 |
| ESBL | 5 |
| Tracheal aspirate | 1 | WT | 1 |
| Annaba | 15 | Tracheal aspirate | 9 | WT | 1 |
| ESBL | 8 |
| Urine | 4 | ESBL | 4 |
| Blood culture | 2 | ESBL | 2 |
| Sidi  Bel Abbes | 18 | Pus | 7 | ESBL | 4 |
| ESBL + Case | 1 |
| Pase IRT | 1 |
| WT | 1 |
| Profound swab | 1 | Pase HL | 1 |
| Bedsore | 2 | ESBL | 2 |
| Tracheal aspirate | 7 | ESBL | 7 |
| Environment | 1 | ESBL | 1 |
| Nice | 1 | Blood culture | 1 | WT | 1 |

ESBL: Extended-spectrum beta-lactamase, Case: Cephalosporinase phenotype, ESBL + Case: Extended-spectrum beta-lactamase associated to Cephalosporinase phenotype, Pase HL: Penicillinase High Level phenotype, Pase IRT: inhibitor-resistant TEM penicillinase, WT: Wild Type phenotype.
