# Supplementary material for: Biotyping of Multidrug-Resistant Klebsiella pneumoniae Clinical Isolates from France and Algeria Using MALDI-TOF MS
Source: PLoS One. 2013 Apr 19;8(4):e61428. doi: 10.1371/journal.pone.0061428 (PMC3631213; doi:10.1371/journal.pone.0061428)
Supplement: Table S2 — Comparison of the clusters obtained according to different cut-offs at 500, 180 and 100 of the dendrogram generated by BIOTYPER software (version 2, Bruker Daltonics). (DOCX) [file pone.0061428.s002.docx]

**Table S2.** Comparison of the clusters obtained according to different cut-offs at 500, 180 and 100 of the dendrogram generated by BIOTYPER software(version 2, Bruker Daltonics).

| **Cut-off at 500** | | | | **Cut-off at 180** | | | | | **Cut-off at 100** | | | | |
| --- | --- | --- | --- | --- | --- | --- | --- | --- | --- | --- | --- | --- | --- |
| **Clusters (Num)** | | **Cities (Num)** | | **Num of clusters** | **Clusters (Num)** | | **Cities (Num)** | | **Num of clusters** | **Clusters (Num)** | | **Cities (Num)** | |
| **C1** | **16** | Marseille | 16 | 2 clusters | C1 | 3 | Marseille | 3 | 1 cluster | C1 | 8 | Marseille | 8 |
| C2 | 10 | Marseille | 10 |
| **C2** | **7** | Annaba  Marseille | 1  6 | 1 cluster | C1 | 2 | Marseille | 2 | No clusters | | | | |
| **C3** | **65** | Annaba  Angers  Marseille  Oran  Nice | 1  2  10  5  47 | 8 clusters | C1 | 2 | Nice | 2 | 8 clusters | C1 | 3 | Nice | 3 |
| C2 | 16 | Nice | 16 | C2 | 2 | Nice | 2 |
| C3 | 2 | Marseille | 1 | C3 | 2 | Nice | 2 |
| Nice | 1 |
| C4 | 8 | Nice | 8 | C4 | 1 | Nice | 2 |
| C5 | 7 | Marseille | 4 | C5 | 3 | Nice | 1 |
| Nice | 3 | Marseille | 2 |
| C6 | 7 | Oran | 3 | C6 | 2 | Nice | 1 |
| Nice | 4 | Oran | 1 |
| C7 | 3 | Nice | 3 | C7 | 2 | Nice | 2 |
| C8 | 7 | Nice | 7 | C8 | 2 | Nice | 2 |
| **C4** | **215** | Annaba  Angers  Nice  Oran  Sidi Bel Abbes  Tlemcen  Marseille | 1  54  6  14  10  13  117 | 16 clusters | C1 | 3 | Marseille | 3 | 26 clusters | C1 | 2 | Marseille | 2 |
| C2 | 4 | Marseille | 4 | C2 | 2 | Marseille | 2 |
| C3 | 4 | Marseille | 4 | C3 | 3 | Marseille | 3 |
| C4 | 3 | Marseille | 3 | C4 | 2 | Marseille | 2 |
| C5 | 10 | Marseille | 10 | C5 | 2 | Marseille | 2 |
| C6 | 2 | Marseille | 2 | C6 | 3 | Marseille | 3 |
| C7 | 43 | Marseille | 43 | C7 | 3 | Marseille | 3 |
| C8 | 4 | Marseille | 4 | C8 | 3 | Marseille | 3 |
| C9 | 4 | Marseille | 4 | C9 | 15 | Marseille | 15 |
| C10 | 14 | Marseille | 14 | C10 | 7 | Marseille | 7 |
| C11 | 17 | Marseille | 17 | C11 | 14 | Marseille | 14 |
| C12 | 4 | Marseille | 1 | C12 | 3 | Marseille | 3 |
| Oran | 1 |
| Angers | 1 |
| Nice | 1 |
| C13 | 27 | Angers | 15 | C13 | 2 | Marseille | 2 |
| Oran | 6 |
| Sidi Bel Abbes | 1 |
| Tlemcen | 1 |
| Marseille | 2 |
| Nice | 2 |
| C14 | 2 | Sidi Bel Abbes | 1 | C14 | 2 | Marseille | 2 |
| Nice | 1 |
| C15 | 6 | Angers | 6 | C15 | 3 | Marseille | 3 |
| C16 | 63 | Angers | 32 | C16 | 4 | Marseille | 4 |
| Oran | 7 |
| Marseille | 1 |
| Sidi Bel Abbes | 8 |
| Tlemcen | 12 |
| Nice | 2 |
| Annaba | 1 |
|  |  |  |  |  | C17 | 7 | Marseille | 7 |
| C18 | 9 | Marseille | 9 |
| C19 | 22 | Angers | 13 |
| Oran | 6 |
| Sidi Bel Abbes | 1 |
| Tlemcen | 1 |
| Marseille | 1 |
| C20 | 3 | Nice | 1 |
| Angers | 1 |
| Marseille | 1 |
| C21 | 4 | Angers | 4 |
| C22 | 10 | Angers | 8 |
| Oran | 1 |
| Marseille | 1 |
| C23 | 3 | Tlemcen | 2 |
| Sidi Bel Abbes | 1 |
| C24 | 19 | Angers | 9 |
| Sidi Bel Abbes | 4 |
| Tlemcen | 5 |
| Oran | 1 |
| C25 | 28 | Angers | 15 |
| Oran | 4 |
| Marseille | 1 |
| Sidi Bel Abbes | 2 |
| Tlemcen | 5 |
| Nice | 1 |
| C26 | 3 | Angers | 1 |
| Oran | 1 |
| Sidi Bel Abbes | 1 |
| **C5** | **232** | Oran  Angers  Tlemcen  Marseille  Annaba  Sidi Bel Abbes  Nice | 74  44  59  21  15  18  1 | 7 clusters | C1 | 3 | Annaba | 2 | 17 Clusters | C1 | 2 | Annaba | 2 |
| Marseille | 1 |
| C2 | 19 | Marseille | 19 | C2 | 5 | Marseille | 5 |
| C3 | 3 | Annaba | 3 | C3 | 4 | Marseille | 4 |
| C4 | 2 | Oran | 1 | C4 | 7 | Marseille | 7 |
| Angers | 1 |  |  |  |  |
| C5 | 93 | Angers | 32 | C5 | 2 | Annaba | 2 |
| Oran | 23 |
| Annaba | 4 |
| Marseille | 1 |
| Sidi Bel Abbes | 13 |
| Tlemcen | 20 |
| C6 | 6 | Nice | 1 | C6 | 2 | Angers | 1 |
| Oran | 1 | Oran | 1 |
| Angers | 4 |
| C7 | 106 | Tlemcen | 39 | C7 | 2 | Annaba | 2 |
| Sidi Bel Abbes | 5 |
| Oran | 49 |
| Angers | 7 |
| Annaba | 5 |
| Marseille | 1 |
|  |  |  |  |  | C8 | 2 | Oran | 2 |
| C9 | 3 | Oran | 2 |
| Sidi Bel Abbes | 1 |
| C10 | 2 | Angers | 1 |
| Oran | 1 |
| C11 | 12 | Angers | 5 |
| Oran | 4 |
| Sidi Bel Abbes | 3 |
| C12 | 71 | Angers | 26 |
| Annaba | 2 |
| Oran | 13 |
| Marseille | 1 |
| Sidi Bel Abbes | 9 |
| Tlemcen | 20 |
| C13 | 3 | Angers | 3 |
| C14 | 51 | Angers | 4 |
| Annaba | 3 |
| Marseille | 1 |
| Oran | 24 |
| Sidi Bel Abbes | 1 |
| Tlemcen | 18 |
| C15 | 3 | Sidi Bel Abbes | 1 |
| Oran | 1 |
| Angers | 1 |
| C16 | 2 | Oran | 1 |
| Tlemcen | 1 |
| C17 | 45 | Angers | 2 |
| Annaba | 1 |
| Oran | 22 |
| Sidi Bel Abbes | 3 |
| Tlemcen | 17 |
